# Supplementary material
Source: publisher figshare collection journal article supplement (https://f1000.figshare.com/ndownloader/files/23064554)
Supplement: Supplementary file 1 [file 23064554]

## Sheet: Penicillin data
	50 µg Penicillin-zone of inhibition diameter analyses						100 µg Penicillin induced-zone of inhibition diameter analyses
Replicate #	Chlamydomonas	LMJ	t-Test: Paired Two Sample for Means			Replicate #	Chlamydomonas	LMJ	t-Test: Paired Two Sample for Means
1	0	33.3				1	0	40.3
2	0	33.4		Chlamydomonas	LMJ	2	0	40.3		Chlamydomonas	LMJ
3	0	33.1	Mean	0	33.2667	3	0	40.2	Mean	0	40.2667
			Variance	0	0.0233333				Variance	0	0.00333333
			Observations	3	3				Observations	3	3
			Pearson Correlation	#DIV/0!					Pearson Correlation	#DIV/0!
			Hypothesized Mean Difference	0					Hypothesized Mean Difference	0
			df	2					df	2
			t Stat	-377.209					t Stat	-1208
			P(T<=t) one-tail	3.51401e-06					P(T<=t) one-tail	3.42638e-07
			t Critical one-tail	2.91999					t Critical one-tail	2.91999
			P(T<=t) two-tail	7.02801e-06					P(T<=t) two-tail	6.85276e-07
			t Critical two-tail	4.30265					t Critical two-tail	4.30265

## Sheet: Polymyxin B data
	50 µg Polymyxin B -zone of inhibition diameter analyses						100 µg Polymyxin B-zone of inhibition diameter analyses		t-Test: Paired Two Sample for Means
Replicate #	Chlamydomonas	LMJ	t-Test: Paired Two Sample for Means			Replicate #	Chlamydomonas	LMJ	t-Test: Paired Two Sample for Means
1	8.5	9.6				1	9.5	10
2	8.7	9.5		Chlamydomonas	LMJ	2	10	10.5		Chlamydomonas	LMJ
3	8.4	9.5	Mean	8.53333	9.53333	3	9.3	10.8	Mean	9.6	10.4333
			Variance	0.0233333	0.00333333				Variance	0.13	0.163333
			Observations	3	3				Observations	3	3
			Pearson Correlation	-0.188982					Pearson Correlation	-0.137253
			Hypothesized Mean Difference	0					Hypothesized Mean Difference	0
			df	2					df	2
			t Stat	-10					t Stat	-2.5
			P(T<=t) one-tail	0.00492623					P(T<=t) one-tail	0.0648059
			t Critical one-tail	2.91999					t Critical one-tail	2.91999
			P(T<=t) two-tail	0.00985246					P(T<=t) two-tail	0.129612
			t Critical two-tail	4.30265					t Critical two-tail	4.30265

## Sheet: Neomycin data
	50 µg Neomycin-zone of inhibition diameter analyses						100 µg Neomycin-zone of inhibition diameter analyses
Replicate #	Chlamydomonas	LMJ	t-Test: Paired Two Sample for Means			Replicate #	Chlamydomonas	LMJ	t-Test: Paired Two Sample for Means
1	9.5	9.6				1	11	12.8
2	10	9.4		Chlamydomonas	LMJ	2	11.1	12.7		Chlamydomonas	LMJ
3	9	9.5	Mean	9.5	9.5	3	11.2	12.6	Mean	11.1	12.7
			Variance	0.25	0.01				Variance	0.01	0.01
			Observations	3	3				Observations	3	3
			Pearson Correlation	-0.5					Pearson Correlation	-1
			Hypothesized Mean Difference	0					Hypothesized Mean Difference	0
			df	2					df	2
			t Stat	0					t Stat	-13.8564
			P(T<=t) one-tail	0.5					P(T<=t) one-tail	0.002584
			t Critical one-tail	2.91999					t Critical one-tail	2.91999
			P(T<=t) two-tail	1					P(T<=t) two-tail	0.00516799
			t Critical two-tail	4.30265					t Critical two-tail	4.30265

## Sheet: Chloramphenicol data
	50 µg chloramphenicol-zone of inhibition diameter analyses						100 µg chloramphenicol-zone of inhibition diameter analyses
Replicate #	Chlamydomonas	LMJ	t-Test: Paired Two Sample for Means			Replicate #	Chlamydomonas	LMJ	t-Test: Paired Two Sample for Means
1	0	28.8				1	0	33.2
2	0	28.7		Chlamydomonas	LMJ	2	0	33.4		Chlamydomonas	LMJ
3	0	28.9	Mean	0	28.8	3	0	33.3	Mean	0	33.3
			Variance	0	0.01				Variance	0	0.01
			Observations	3	3				Observations	3	3
			Pearson Correlation	#DIV/0!					Pearson Correlation	#DIV/0!
			Hypothesized Mean Difference	0					Hypothesized Mean Difference	0
			df	2					df	2
			t Stat	-498.831					t Stat	-576.773
			P(T<=t) one-tail	2.00938e-06					P(T<=t) one-tail	1.503e-06
			t Critical one-tail	2.91999					t Critical one-tail	2.91999
			P(T<=t) two-tail	4.01875e-06					P(T<=t) two-tail	3.006e-06
			t Critical two-tail	4.30265					t Critical two-tail	4.30265
